# Supplementary material for: Intrahippocampal Inoculation of Aβ1–42 Peptide in Rat as a Model of Alzheimer’s Disease Identified MicroRNA-146a-5p as Blood Marker with Anti-Inflammatory Function in Astrocyte Cells
Source: Cells. 2023 Feb 22;12(5):694. doi: 10.3390/cells12050694 (PMC10000752; doi:10.3390/cells12050694)
Supplement: Supplementary file 1 [file cells-12-00694-s001.zip › cells-2142170-supplementary.pdf]

# Supplementary data

Table 1. Sequence of microRNA primers

| mature microRNA | Sequence                | Sanger Accession | Catalog number |
|-----------------|-------------------------|------------------|----------------|
| rno-miR-9a-5p   | UCUUUGGUUAUCUAGCUGUAUGA | MIMAT0000781     | MS00013951     |
| rno-miR-146a-5p | UGAGAACUGAAUCCAUGGGUU   | MIMAT0000852     | MS00000441     |
| rno-miR-29a-3p  | UAGCACCAUCUGAAAUCGGUUA  | MIMAT0000802     | MS00033397     |
| rno-miR-29c-3p  | UAGCACCAUUUGAAAUCGGUUA  | MIMAT0000803     | MS00000175     |
| cel-miR-39-3p   | UCACCGGGUGUAAAUCAGCUUG  | MIMAT0000010     | MS00019789     |
| cel-miR-238-3p  | UUUGUACUCCGAUGCCAUCAGCA | MIMAT0000293     | MS00019439     |
| cel-miR-248     | AUACACGUGCACGGAUACGCUCA | MIMAT0000304     | MS00019516     |

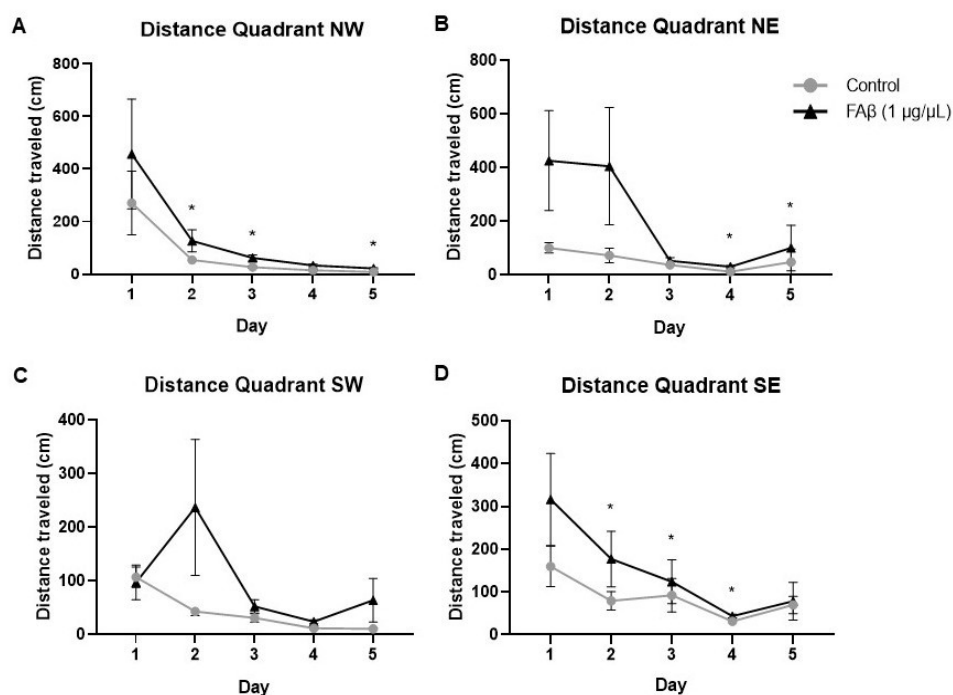

Figure S1. Effects of FAβ<sub>1-42</sub> injection on memory and learning evaluated by the Morris Water Maze test. The distance performed by rats (n = 10) injected with Faβ<sub>1-42</sub> peptide solutions (1 µg/µL) was evaluated, at day 14 post-injection. Distance (A) in the quadrant NW (B) in the quadrant NE, (C) in the quadrant SW (D), in the target quadrant SE. Control

group of rats (n=10) was injected with PBS solution. Data are represented as mean  $\pm$  SEM. Statistical comparisons were performed using Kruskal-Wallis. \* $p \leq 0.05$ .

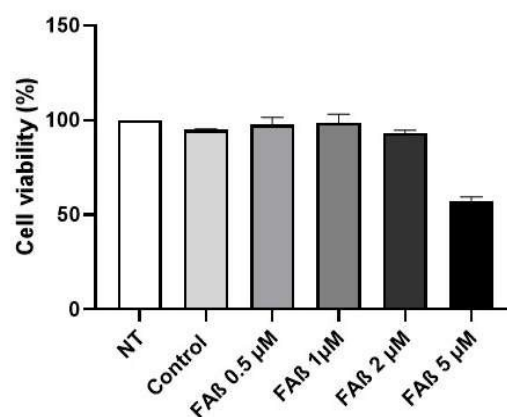

Figure S2. Incubation of primary astrocytes cell culture with FA $_{1-42}$  peptides solutions at indicated concentrations did not lead to any cellular toxicity. Alamar Blue cell viability assay of primary Astrocyte cell culture treated with FA $_{1-42}$  peptide solutions. The fluorescence value from the untreated cells (NT) was set up as the arbitral value of 100 %.
